# Supplementary material
Source: PubMed Central journal article supplement (PMC4059218)
Supplement: ma5006606_si_001.pdf [file ma5006606_si_001.pdf]

## SUPPORTING INFORMATION

### Dual-Emissive Difluoroboron Naphthyl-Phenyl $\beta$ -Diketonate Polylactide Materials: Effects of Heavy Atom Placement and Polymer Molecular Weight

*Jelena Samonina-Kosicka, Christopher A. DeRosa, William A. Morris, Ziyi Fan, Cassandra L. Fraser\**

Department of Chemistry, University of Virginia, McCormick Road, Charlottesville, VA 22904

Table S1. Polymer Synthesis (9-12).

|                            | Sample # | Loading <sup>a</sup> | Time (h) | M <sub>n</sub> <sup>b</sup> (kDa) | PDI  | M <sub>n</sub> <sup>c</sup> (kDa) | Yield <sup>d</sup> (%) |
|----------------------------|----------|----------------------|----------|-----------------------------------|------|-----------------------------------|------------------------|
| BF <sub>2</sub> nbmPLA     | 9a       | 1:50:1/50            | 1.0      | 5.4                               | 1.05 | 3.8                               | 0.45                   |
|                            | 9b       | 1:50:1/40            | 1.0      | 7.7                               | 1.04 | 6.6                               | 0.69                   |
|                            | 9c       | 1:180:1/40           | 1.5      | 16.1                              | 1.07 | 13.5                              | 0.59                   |
| BF <sub>2</sub> n(Br)bmPLA | 10a      | 1:50:1/50            | 1.5      | 6.8                               | 1.03 | 3.9                               | 0.44                   |
|                            | 10b      | 1:50:1/50            | 2.0      | 8.8                               | 1.04 | 7.1                               | 0.54                   |
|                            | 10c      | 1:100:1/50           | 4.0      | 11.7                              | 1.04 | 14.6                              | 0.65                   |
|                            | 10d      | 1:300:1/40           | 9.0      | 26.2                              | 1.07 | 35.7                              | 0.55                   |
| BF <sub>2</sub> bnmPLA     | 11a      | 1:50:1/50            | 1.0      | 5.2                               | 1.09 | 3.3                               | 0.64                   |
|                            | 11b      | 1:100:1/40           | 1.5      | 7.5                               | 1.08 | 7.1                               | 0.56                   |
|                            | 11c      | 1:100:1/40           | 4.0      | 9.5                               | 1.04 | 9.1                               | 0.63                   |
| BF <sub>2</sub> b(Br)nmPLA | 12a      | 1:50:1/45            | 1.0      | 5.6                               | 1.07 | 4.1                               | 0.40                   |
|                            | 12b      | 1:150:1/40           | 3.0      | 12.9                              | 1.04 | 9.4                               | 0.57                   |
|                            | 12c      | 1:300:1/40           | 1.5      | 16.6                              | 1.07 | 13.5                              | 0.40                   |

<sup>a</sup>Loading (initiator/monomer/cat.). <sup>b</sup>Number-average molecular weight detected by DAD, LS/RI detectors in THF solvent. <sup>c</sup>Number-average molecular detected by <sup>1</sup>H NMR. <sup>d</sup>Corrected for monomer conversion.

Table S2. Kinetics Study of Ring Opening Polymerization using BF<sub>2</sub>n(Br)bmOH as an initiator.

| time | monomer conversion | M <sub>w</sub> | M <sub>n</sub> | PDI  |
|------|--------------------|----------------|----------------|------|
| 0    | 0                  | 0              | 0              | -    |
| 5    | 23                 | 2400           | 1800           | 1.33 |
| 10   | 30                 | 3300           | 2600           | 1.24 |
| 30   | 51                 | 4800           | 4700           | 1.05 |
| 60   | 67                 | 5600           | 5500           | 1.04 |
| 80   | 75                 | 6000           | 5700           | 1.03 |
| 105  | 83                 | 6100           | 6000           | 1.03 |
| 135  | 87                 | 6300           | 6100           | 1.03 |
| 190  | 93                 | 6900           | 6600           | 1.05 |

Table S3. Absorption and Emission Data for Boron Initiators and Polymer Samples in CH<sub>2</sub>Cl<sub>2</sub>.

|                            |            | $\lambda_{\text{abs}}^a$<br>(nm) | $\epsilon^b$<br>(M <sup>-1</sup> cm <sup>-1</sup> ) | $\lambda_{\text{em}}^c$<br>(nm) | $\tau_F^d$<br>(ns) | $\Phi_F^e$ | $\tau_{\text{rad}}^f$ | Stokes shift<br>(cm <sup>-1</sup> ) |
|----------------------------|------------|----------------------------------|-----------------------------------------------------|---------------------------------|--------------------|------------|-----------------------|-------------------------------------|
| BF <sub>2</sub> nbmOH      | <b>5</b>   | 414                              | 59 000                                              | 452                             | 1.55               | 0.40       | 3.9                   | 2031                                |
| BF <sub>2</sub> nbmPLA     | <b>9a</b>  | 414                              | 62 000                                              | 458                             | 1.73               | 0.39       | 4.4                   | 2321                                |
|                            | <b>9b</b>  | 414                              | 54 000                                              | 458                             | 1.75               | 0.38       | 4.6                   | 2321                                |
|                            | <b>9c</b>  | 414                              | 48 000                                              | 455                             | 1.75               | 0.46       | 3.8                   | 2177                                |
| BF <sub>2</sub> n(Br)bmOH  | <b>6</b>   | 417                              | 65 000                                              | 448                             | 0.53               | 0.19       | 2.8                   | 1659                                |
| BF <sub>2</sub> n(Br)bmPLA | <b>10a</b> | 416                              | 63 000                                              | 449                             | 0.52               | 0.18       | 2.9                   | 1767                                |
|                            | <b>10b</b> | 416                              | 50 000                                              | 448                             | 0.52               | 0.18       | 2.9                   | 1717                                |
|                            | <b>10c</b> | 417                              | 64 000                                              | 446                             | 0.50               | 0.19       | 2.6                   | 1559                                |
|                            | <b>10d</b> | 417                              | 59 000                                              | 446                             | 0.51               | 0.18       | 2.8                   | 1559                                |
| BF <sub>2</sub> bnmOH      | <b>7</b>   | 418                              | 52 000                                              | 505                             | 3.41               | 0.64       | 5.3                   | 4121                                |
| BF <sub>2</sub> bnmPLA     | <b>11a</b> | 418                              | 48 000                                              | 504                             | 3.35               | 0.78       | 4.3                   | 4082                                |
|                            | <b>11b</b> | 418                              | 43 000                                              | 501                             | 3.32               | 0.71       | 4.7                   | 3963                                |
|                            | <b>11c</b> | 418                              | 39 000                                              | 501                             | 3.33               | 0.73       | 4.6                   | 3963                                |
| BF <sub>2</sub> b(Br)nmOH  | <b>8</b>   | 425                              | 48 000                                              | 521                             | 3.33               | 0.75       | 4.4                   | 4336                                |
| BF <sub>2</sub> b(Br)nmPLA | <b>12a</b> | 425                              | 25 000                                              | 514                             | 3.27               | 0.72       | 4.5                   | 4074                                |
|                            | <b>12b</b> | 425                              | 33 000                                              | 514                             | 3.23               | 0.75       | 4.3                   | 4074                                |
|                            | <b>12c</b> | 425                              | 24 000                                              | 512                             | 3.21               | 0.91       | 3.5                   | 3998                                |

<sup>a</sup>Absorption maxima. <sup>b</sup>Extinction coefficients calculated at the absorption maxima. <sup>c</sup>Fluorescence emission maxima. <sup>d</sup>Fluorescence lifetime excited with a 369 nm light-emitting diode (LED) monitored at the emission maximum. All fluorescence lifetimes are fitted with single-exponential decay. <sup>e</sup>Relative quantum yield, with anthracene in EtOH as a standard. <sup>f</sup>Radiative lifetime, where  $\tau_{\text{rad}} = \tau_F / \Phi_F$ .

## Full Computational Details

All compounds were modeled using the Gaussian 09 suite of programs<sup>1</sup> using density functional theory. We chose B3LYP/6-31+G(d) for ground state geometry optimization with a Tomasi polarized continuum for dichloromethane solvent. The vibrational frequencies for the optimized geometries were all positive, assuring that the geometries are at least a local minimum. Single point energy calculations were used to generate the molecular orbital diagrams utilizing B3LYP/6-31G(d). We used time-dependent density functional theory, TD-B3LYP/6-311+G(d) for estimates of the absorption spectra, at the respective optimized geometries.<sup>2,3</sup> The first three excited states were computed for each compound. Molecular orbitals were depicted by GaussView 5 software.<sup>4</sup>

### Part I. Gaussian 09 Specifications for Initiators 5-8 in CH<sub>2</sub>Cl<sub>2</sub> Solvent.

Table S4. B3LYP/6-31+G(d) optimized structures for future TD-DFT calculation in dichloromethane. Coordinates given in Cartesian, in Angstroms.

#### 5. BF<sub>2</sub>nbmC<sub>2</sub>H<sub>4</sub>OH: E (HF) = -1336.17162124

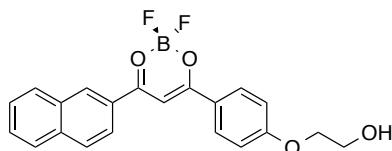

B, -0.637245, 2.650393, 0.070921  
F, -0.663738, 3.013377, 1.441615  
F, -0.743982, 3.800648, -0.722173  
O, -1.789629, 1.773891, -0.217257  
C, -1.654766, 0.447202, -0.049804  
C, -0.391883, -0.125942, 0.054211  
H, -0.295970, -1.190816, 0.208234  
O, 0.642511, 1.985830, -0.230515  
C, 0.768851, 0.659690, -0.062786  
C, -2.920522, -0.292115, -0.018560  
C, -2.983700, -1.697248, 0.083273  
C, -4.146740, 0.416500, -0.099304  
C, -4.204993, -2.371942, 0.113244  
H, -2.074699, -2.285259, 0.138525  
C, -5.391197, -0.244210, -0.074313  
H, -4.117547, 1.497420, -0.180395  
C, -5.434336, -1.671061, 0.035901  
H, -4.214112, -3.455103, 0.195334  
C, -6.617959, 0.466091, -0.152452

C, -6.685130, -2.329233, 0.063048  
 C, -7.846586, -0.209347, -0.122328  
 H, -6.598347, 1.549068, -0.236135  
 C, -7.884248, -1.602604, -0.014995  
 H, -6.713278, -3.412147, 0.145506  
 H, -8.769915, 0.357854, -0.183414  
 H, -8.834829, -2.125289, 0.008020  
 C, 2.125621, 0.143911, -0.048020  
 C, 3.222272, 1.036000, -0.096713  
 C, 2.421034, -1.244468, 0.010808  
 C, 4.539665, 0.583127, -0.080836  
 H, 3.029091, 2.101802, -0.141342  
 C, 3.726847, -1.702547, 0.028079  
 H, 1.621061, -1.977062, 0.038705  
 C, 4.802524, -0.794141, -0.016746  
 H, 5.347256, 1.305630, -0.115638  
 H, 3.941329, -2.766349, 0.073060  
 O, 6.048829, -1.346718, 0.004774  
 C, 7.191899, -0.487490, -0.035670  
 H, 7.187350, 0.108512, -0.956906  
 H, 7.188924, 0.189688, 0.827587  
 C, 8.417252, -1.388658, 0.004449  
 H, 8.406918, -2.069392, -0.857112  
 H, 8.408663, -1.987405, 0.924878  
 O, 9.555948, -0.52550, -0.036401  
 H, 10.359134, -1.068058, -0.006203

**6. BF<sub>2</sub>n(Br)bmC<sub>2</sub>H<sub>4</sub>OH: E(HF) = -3907.30673415**

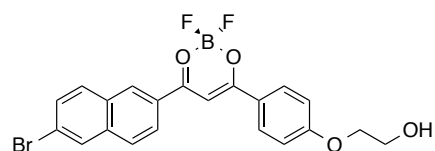

B, 1.067747, 3.057564, -0.065497  
 F, 1.050160, 3.618824, 1.215305  
 F, 1.093300, 4.039382, -1.045949  
 O, -0.153543, 2.230608, -0.247094  
 C, -0.152054, 0.934120, -0.040788  
 C, 1.046640, 0.243978, 0.134670  
 H, 1.036101, -0.814045, 0.340678  
 O, 2.286915, 2.214651, -0.202898  
 C, 2.270496, 0.919466, -0.000988  
 C, 3.575922, 0.267213, 0.050473  
 C, 3.717601, -1.139645, 0.093980  
 C, 4.745530, 1.052464, 0.062978  
 C, 4.968435, -1.726684, 0.152866  
 H, 2.847341, -1.786172, 0.068150

C,6.008503,0.474323,0.124356  
 H,4.658569,2.132782,0.032371  
 C,6.128546,-0.926125,0.171380  
 H,5.077678,-2.806279,0.180071  
 H,6.883290,1.113229,0.138362  
 C,-1.477357,0.294092,-0.031104  
 C,-1.626175,-1.126522,-0.015352  
 C,-2.614755,1.092473,-0.043939  
 C,-2.873327,-1.701752,-0.008590  
 H,-0.753646,-1.769790,-0.024708  
 C,-3.911304,0.525434,-0.034737  
 H,-2.511297,2.172285,-0.055170  
 C,-4.050714,-0.900685,-0.015393  
 H,-2.972553,-2.783906,-0.002432  
 C,-5.082858,1.333528,-0.038455  
 C,-5.349542,-1.473070,-0.004721  
 C,-6.336114,0.763085,-0.025235  
 H,-4.979568,2.415331,-0.051571  
 C,-6.451413,-0.648011,-0.008482  
 H,-5.460070,-2.552597,0.008258  
 H,-7.227331,1.381046,-0.027716  
 Br,-8.201137,-1.414043,0.009793  
 O,7.301762,-1.593429,0.236540  
 C,8.536569,-0.855954,0.241637  
 H,8.600269,-0.237107,-0.661109  
 H,8.575687,-0.211341,1.128168  
 C,9.681818,-1.842447,0.280971  
 H,10.605287,-1.279920,0.477940  
 H,9.528141,-2.557993,1.099712  
 O,9.755470,-2.514555,-0.978124  
 H,10.450526,-3.189586,-0.931009

**7. BF<sub>2</sub>bnmOC<sub>2</sub>H<sub>4</sub>OH: E (HF) = -1336.17516942**

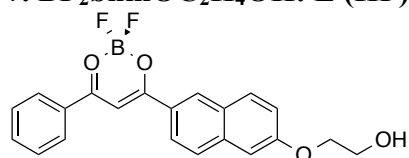

B, 2.984043, 2.358484, 0.047310  
 F, 3.034083, 2.852428, 1.354130  
 F, 3.159119, 3.373069, -0.883282  
 O, 1.657598, 1.726235, -0.179877  
 C, 1.462154, 0.436080, -0.043696  
 C, 2.556220, -0.429127, 0.098668  
 H, 2.396069, -1.484238, 0.251195  
 O, 4.070950, 1.356495, -0.129587  
 C, 3.856136, 0.069905, -0.002061

C, 0.068021, -0.007176, -0.076275  
 C, -0.286237, -1.394533, -0.097518  
 C, -0.948106, 0.945016, -0.085980  
 C, -1.600925, -1.784337, -0.124042  
 H, 0.484576, -2.157031, -0.105540  
 C, -2.309208, 0.569959, -0.111106  
 H, -0.691793, 1.999260, -0.067493  
 C, -2.658242, -0.823899, -0.129883  
 H, -1.852553, -2.841513, -0.144676  
 C, -3.355734, 1.532112, -0.115953  
 C, -4.017402, -1.196553, -0.154747  
 C, -4.679776, 1.151453, -0.140547  
 H, -3.100283, 2.588580, -0.100467  
 C, -5.017247, -0.231458, -0.160736  
 H, -4.297638, -2.246132, -0.168562  
 H, -5.453735, 1.909837, -0.144799  
 O, -6.295956, -0.690947, -0.190849  
 C, -7.388423, 0.240114, -0.178168  
 H, -7.337669, 0.864407, 0.722233  
 H, -7.341523, 0.881429, -1.067081  
 C, -8.682300, -0.543422, -0.194339  
 H, -9.503933, 0.162764, -0.379829  
 H, -8.660921, -1.276241, -1.011883  
 O, -8.847605, -1.192211, 1.068710  
 H, -9.640355, -1.749950, 1.030692  
 C, 5.062947, -0.774590, 0.010723  
 C, 6.322585, -0.172250, 0.197134  
 C, 4.991286, -2.171009, -0.161398  
 C, 7.478923, -0.949666, 0.222461  
 H, 6.383441, 0.902155, 0.330008  
 C, 6.150827, -2.943423, -0.140058  
 H, 4.037725, -2.658696, -0.334035  
 C, 7.396738, -2.336314, 0.054661  
 H, 8.443935, -0.474619, 0.374544  
 H, 6.083240, -4.018334, -0.280949  
 H, 8.299081, -2.941419, 0.072454

**8. BF<sub>2</sub>b(Br)nmOC<sub>2</sub>H<sub>4</sub>OH; E(HF) = -3907.30337535**

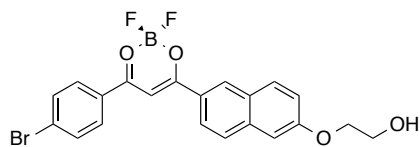

B, 1.268271, 3.056378, 0.042504  
 F, 1.250971, 3.565001, 1.343566

F,1.306860,4.075295,-0.898639  
O,0.037720,2.249976,-0.176763  
C,0.016469,0.943626,-0.068921  
C,1.217688,0.228947,0.053728  
H,1.200207,-0.840977,0.184947  
O,2.480546,2.207033,-0.124574  
C,2.436605,0.901394,-0.023038  
C,3.746451,0.228242,-0.005991  
C,3.869864,-1.159917,-0.201931  
C,4.910132,0.992705,0.199166  
C,5.119472,-1.772733,-0.185966  
H,2.996643,-1.775270,-0.388760  
C,6.164728,0.389752,0.215882  
H,4.827289,2.063097,0.349714  
C,6.256679,-0.989977,0.024690  
H,5.205785,-2.842204,-0.342868  
H,7.056349,0.984979,0.379568  
C,-1.304847,0.318417,-0.106379  
C,-1.468966,-1.102287,-0.179460  
C,-2.440040,1.124480,-0.069683  
C,-2.719143,-1.665093,-0.212444  
H,-0.602129,-1.751910,-0.225595  
C,-3.737851,0.569679,-0.098406  
H,-2.328486,2.202322,-0.011815  
C,-3.896208,-0.856760,-0.171709  
H,-2.826561,-2.744905,-0.274048  
C,-4.904402,1.380939,-0.055269  
C,-5.192701,-1.408644,-0.201188  
C,-6.165021,0.825676,-0.084101  
H,-4.793481,2.460822,0.000869  
C,-6.313667,-0.588167,-0.158595  
H,-5.328551,-2.485137,-0.255160  
H,-7.033744,1.472199,-0.050242  
Br,7.968431,-1.824337,0.051619  
O,-7.518950,-1.214622,-0.195670  
C,-8.727064,-0.441594,-0.132746  
H,-8.741778,0.155349,0.787193  
H,-8.786568,0.227680,-1.000226  
C,-9.903086,-1.392712,-0.152264  
H,-10.816397,-0.798909,-0.298550  
H,-9.802044,-2.090456,-0.994246  
O,-9.950421,-2.096640,1.091018  
H,-10.665166,-2.751250,1.051324

**Table S5.** Characterizations of Spectra Computed in Solvent Dichloromethane (PCM-Tomasi as implemented in Gaussian).

Note: Max amplitude is 0.70714 for a pure one-electron excitation. The highest occupied molecular orbital (HOMO) to the lowest unoccupied molecular orbital (LUMO) transitions are in bold.

### 5. BF<sub>2</sub>nbmC<sub>2</sub>H<sub>4</sub>OH

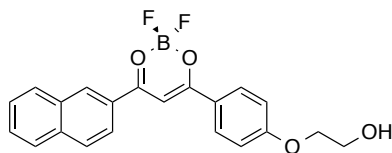

**Excited State 1: Singlet-A 2.5736 eV 481.76 nm f=0.6333 <S\*\*2>=0.000**  
**99 ->100 0.70358**

Excited State 2: Singlet-A 2.9728 eV 417.06 nm f=1.0186 <S\*\*2>=0.000  
 97 ->100 0.10141  
 98 ->100 0.69630

Excited State 3: Singlet-A 3.6424 eV 340.39 nm f=0.0725 <S\*\*2>=0.000  
 96 ->100 0.11216  
 97 ->100 0.67779

### 6. BF<sub>2</sub>n(Br)bmC<sub>2</sub>H<sub>4</sub>OH

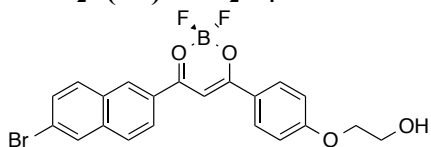

**Excited State 1: Singlet-A 2.9230 eV 424.17 nm f=1.1826 <S\*\*2>=0.000**  
**116 ->117 0.70224**

Excited State 2: Singlet-A 3.1889 eV 388.80 nm f=0.3501 <S\*\*2>=0.000  
 114 ->117 0.17290  
 115 ->117 0.67634

Excited State 3: Singlet-A 3.6507 eV 339.62 nm f=0.0734 <S\*\*2>=0.000  
 114 ->117 0.66024  
 115 ->117 -0.17869  
 116 ->119 0.11843



## 7. BF<sub>2</sub>bnmOC<sub>2</sub>H<sub>4</sub>OH

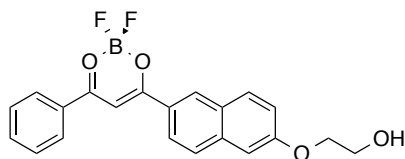

**Excited State 1: Singlet-A 2.6838 eV 461.98 nm f=0.6974 <S\*\*2>=0.000**  
**99 ->100 0.70145**

Excited State 2: Singlet-A 3.2668 eV 379.53 nm f=0.5237 <S\*\*2>=0.000  
98 ->100 0.69405

Excited State 3: Singlet-A 3.7571 eV 330.00 nm f=0.2364 <S\*\*2>=0.000  
96 ->100 -0.16456  
97 ->100 0.64930  
99 ->101 0.10222  
99 ->102 0.17709

## 8. BF<sub>2</sub>b(Br)nmOC<sub>2</sub>H<sub>4</sub>OH

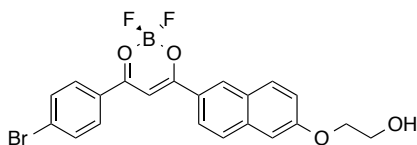

**Excited State 1: Singlet-A 2.6327 eV 470.93 nm f=0.7578 <S\*\*2>=0.000**  
**116 ->117 0.70161**

Excited State 2: Singlet-A 3.2063 eV 386.69 nm f=0.6128 <S\*\*2>=0.000  
115 ->117 0.69568

Excited State 3: Singlet-A 3.6188 eV 342.61 nm f=0.2426 <S\*\*2>=0.000  
114 ->117 0.67741  
116 ->119 -0.15970

Table S6. Gaussview traces of computed TD-B3LYP/6-311+G(d) absorption spectra for initiators **5-8** in CH<sub>2</sub>Cl<sub>2</sub> represented by Tomasi's Polarizable Continuum Model.

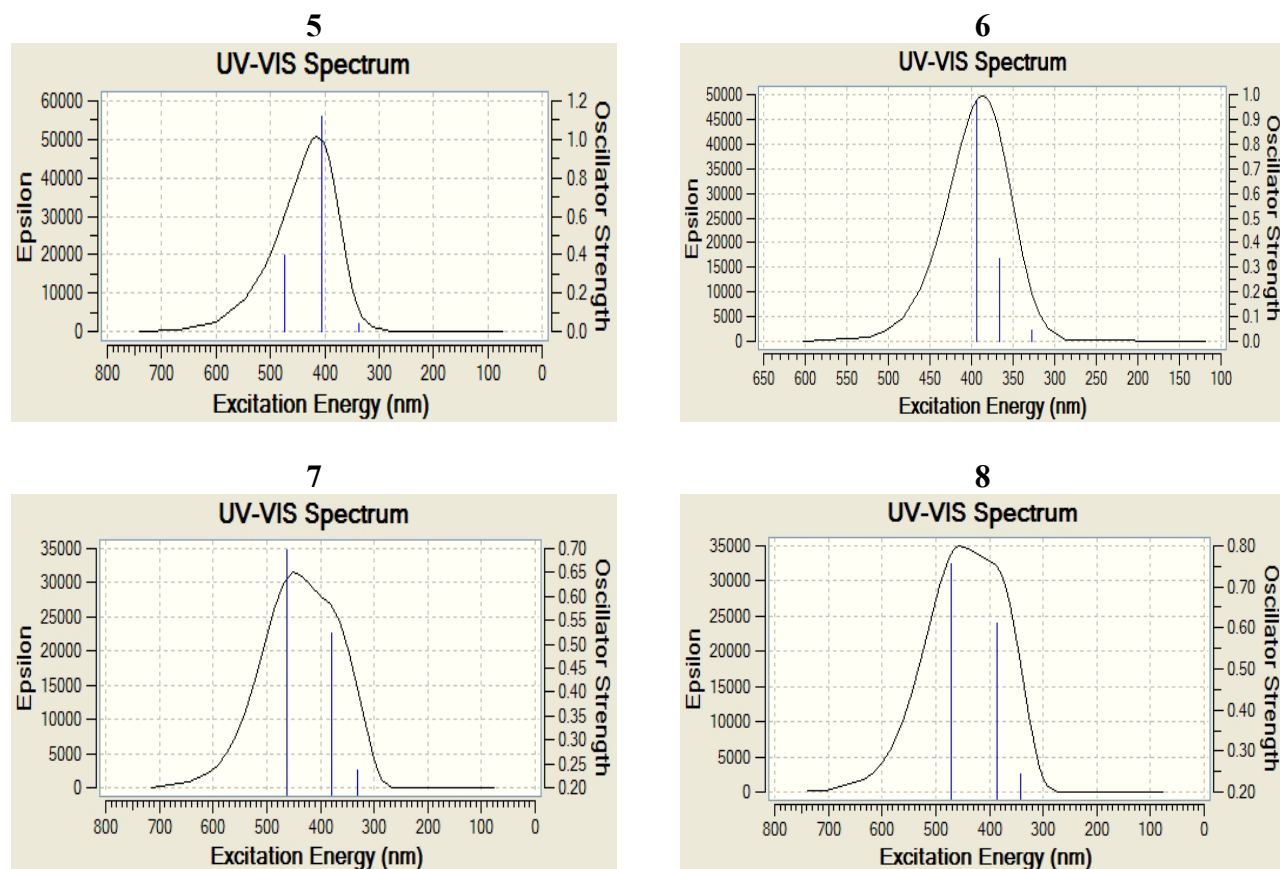

Table S7. Luminescence Data for Films Made from Boron Polymers of Different Molecular Weights.

| Polymer   | Fluorescence                         |                                      |                        |       |                                       | RTP                                  |                        |       |                                       |
|-----------|--------------------------------------|--------------------------------------|------------------------|-------|---------------------------------------|--------------------------------------|------------------------|-------|---------------------------------------|
|           | M <sub>n</sub> <sup>a</sup><br>(GPC) | λ <sub>em</sub> <sup>b</sup><br>(nm) | τ <sub>F</sub><br>(ns) | %     | τ <sub>pw0</sub> <sup>c</sup><br>(ns) | λ <sub>em</sub> <sup>d</sup><br>(nm) | τ <sub>P</sub><br>(ms) | %     | τ <sub>pw0</sub> <sup>e</sup><br>(ms) |
| <b>9a</b> | 5.4                                  | 526                                  | 9.56                   | 46.76 | 12.85                                 | 558                                  | 44.03                  | 59.98 | 69.76                                 |
|           |                                      |                                      | 2.64                   | 21.32 |                                       |                                      | 132.5                  | 32.36 |                                       |
|           |                                      |                                      | 24.50                  | 31.92 |                                       |                                      | 6.24                   | 7.66  |                                       |
| <b>9b</b> | 7.7                                  | 496                                  | 6.98                   | 47.17 | 8.84                                  | 555                                  | 8.24                   | 5.32  | 102.7                                 |
|           |                                      |                                      | 1.78                   | 25.00 |                                       |                                      | 60.04                  | 58.63 |                                       |
|           |                                      |                                      | 18.32                  | 27.84 |                                       |                                      | 185.9                  | 36.06 |                                       |
| <b>9c</b> | 16.1                                 | 461                                  | 0.64                   | 37.56 | 2.57                                  | 552                                  | 76.87                  | 49.09 | 130.9                                 |
|           |                                      |                                      | 2.37                   | 48.14 |                                       |                                      | 291.3                  | 30.56 |                                       |
|           |                                      |                                      | 8.35                   | 14.30 |                                       |                                      | 20.18                  | 20.35 |                                       |

|            |      |     |      |       |       |     |        |       |       |
|------------|------|-----|------|-------|-------|-----|--------|-------|-------|
| <b>10a</b> | 6.8  | 491 | 0.79 | 62.74 | 3.69  | 568 | 3.27   | 10.94 | 10.50 |
|            |      |     | 2.36 | 29.32 |       |     | 10.31  | 78.98 |       |
| <b>10b</b> | 8.8  | 483 | 0.84 | 64.55 | 1.71  | 565 | 1.28   | 4.06  | 11.61 |
|            |      |     | 2.58 | 30.14 |       |     | 16.85  | 31.34 |       |
| <b>10c</b> | 11.7 | 467 | 0.71 | 83.07 | 1.02  | 566 | 13.89  | 90.09 | 14.36 |
|            |      |     | 2.08 | 14.34 |       |     | 37.37  | 4.45  |       |
| <b>10d</b> | 26.2 | 444 | 0.63 | 100   | 0.63  | 565 | 70.61  | 1.08  | 14.64 |
|            |      | 460 | 0.76 | 100   |       |     | 0.76   | 6.12  |       |
| <b>11a</b> | 5.2  | 533 | 2.80 | 12.06 | 13.39 | 550 | 16.16  | 69.26 | 20.26 |
|            |      |     | 9.89 | 52.81 |       |     | 41.47  | 20.98 |       |
| <b>11b</b> | 7.5  | 512 | 3.04 | 23.74 | 9.10  | 540 | 117.2  | 34.73 | 61.94 |
|            |      |     | 7.77 | 54.22 |       |     | 36.74  | 55.90 |       |
| <b>11c</b> | 9.5  | 505 | 2.78 | 31.48 | 7.74  | 545 | 50.80  | 54.86 | 91.14 |
|            |      |     | 7.04 | 49.73 |       |     | 185.1  | 33.57 |       |
| <b>12a</b> | 5.6  | 518 | 1.59 | 23.09 | 5.00  | 538 | 19.21  | 55.33 | 25.95 |
|            |      |     | 4.49 | 60.91 |       |     | 70.67  | 20.00 |       |
| <b>12b</b> | 12.9 | 500 | 0.74 | 11.35 | 3.47  | 538 | 29.59  | 56.04 | 40.76 |
|            |      |     | 3.10 | 76.15 |       |     | 110.7  | 20.22 |       |
| <b>12c</b> | 16.6 | 495 | 2.39 | 73.80 | 3.25  | 539 | 6.68   | 18.64 | 45.81 |
|            |      |     | 5.06 | 24.95 |       |     | 28.85  | 55.93 |       |
|            |      |     | 13.2 | 1.17  |       |     | 111.82 | 25.43 |       |

<sup>a</sup>Number-average molecular weight detected by DAD, LS/RI detectors in THF solvent. <sup>b</sup>Steady-state fluorescence spectra emission maximum under air. Excitation source: 369 nm xenon lamp. <sup>c</sup>Fluorescence lifetime excited with a 369 nm light-emitting diode (LED) monitored at the emission maximum. All fluorescence lifetimes are fitted with single-exponential decay. <sup>d</sup>Delayed emission spectra maximum under N<sub>2</sub>. Excitation source: xenon flash lamp <sup>e</sup>Pre-exponential weighted RTP lifetime. Excitation source: xenon flash lamp; RTP lifetime fit to triple-exponential decay.

- (1) M. J. Frisch, G. W. T., H. B. Schlegel, G. E. Scuseria, M. A. Robb, J. R. Cheeseman, G. Scalmani, V. Barone, B. Mennucci, G. A. Petersson, H. Nakatsuji, M. Caricato, X. Li, H. P. Hratchian, A. F. Izmaylov, J. Bloino, G. Zheng, J. L. Sonnenberg, M. Hada, M. Ehara, K. Toyota, R. Fukuda, J. Hasegawa, M. Ishida, T. Nakajima, Y. Honda, O. Kitao, H. Nakai, T. Vreven, J. A. Montgomery, Jr., J. E. Peralta, F. Ogliaro, M. Bearpark, J. J. Heyd, E. Brothers, K. N. Kudin, V. N. Staroverov, R. Kobayashi, J. Normand, K. Raghavachari, A. Rendell, J. C. Burant, S. S. Iyengar, J. Tomasi, M. Cossi, N. Rega, J. M. Millam, M. Klene, J. E. Knox, J. B. Cross, V. Bakken, C. Adamo, J. Jaramillo, R. Gomperts, R. E. Stratmann, O. Yazyev, A. J. Austin, R. Cammi, C. Pomelli, J. W. Ochterski, R. L. Martin, K. Morokuma, V. G. Zakrzewski, G. A. Voth, P. Salvador, J. J. Dannenberg, S. Dapprich, A. D. Daniels, Ö. Farkas, J. B. Foresman, J. V. Ortiz, J. Cioslowski, and D. J. Fox, Gaussian, Inc., Wallingford CT, 2009.
- (2) Becke, A. D. *J. Chem. Phys.* **1993**, *98*, 5648-5652.
- (3) Lee, C.; Yang, W.; Parr, R. G. *Phys. Rev. B: Condens. Matter* **1988**, *37*, 785-789.
- (4) Dennington, R.; Keith, T.; Millam, J. In *Shawnee Mission KS*; Semichem Inc.: 2009; Vol. GaussView Version 5.
